# Supplementary material
Source: PubMed Central journal article supplement (PMC3243541)
Supplement: supp_M111.241232_jbc.M111.241232-1.pdf [file supp_M111.241232_jbc.M111.241232-1.pdf]

## Supplemental figure legends

**Supplemental Fig 1.** Formation of a stable complex between  $\alpha$ -synuclein and DAT has been further confirmed by co-immunoprecipitation experiments [27-28], and also verified in the present study. Note that total DAT levels do not change in the presence or absence of  $\alpha$ -synuclein.

**Supplemental Fig 2.** Western blotting of  $\alpha$ -synuclein protein. *A)* Serial dilution of recombinant  $\alpha$ -synuclein protein (0.01–0.2  $\mu$ g) was loaded across the lanes and probed by Western analysis. *B)* Standard curve generated from the densitometric values obtained from digitized film of the immunoblot. A linear relationship between optical density and the amount of recombinant  $\alpha$ -synuclein protein exist with a correlation coefficient of 0.95. The lower (~19 kDa) and higher molecular weight species (~37 kDa) of recombinant human  $\alpha$ -synuclein peptide are shown. *C)* Representative blots with an antibody against  $\alpha$ -synuclein show 19 kDa bands in mouse midbrain region but not in 1RB3AN27-DAT cell, YFP-DAT-CHO cells. *D)* Consistent with the literature, presence or absence of endogenous levels of alpha-synuclein does not influence DAT-mediated current.

**Supplemental Fig 3.** Compared to the absence of  $\alpha$ -synuclein, the intracellular  $\alpha$ -synuclein increased the magnitude of currents at -80 mV and -100 mV about 3.9 and 3.3 fold, respectively. The whole-cell currents measured in Fig 2 are normalized for a fixed potential of +60 mV.

**Supplemental table 1.** Tested at multiple concentrations, uptake rate of  $ASP^+$  is decreased in cells expressing  $\alpha$ -synuclein relative to cells not expressing  $\alpha$ -synuclein. Symbol \* details a significant difference ( $P < 0.05$ ) in uptake rate between cells expressing  $\alpha$ -synuclein relative to cells not expressing  $\alpha$ -synuclein at the respective concentration.

**Supplemental table 2.** Rate of uptake of DAT substrate  $ASP^+$  (2  $\mu$ M) is decreased in a concentration dependent manner by dopamine. In addition, in these experiments the rate of uptake of  $ASP^+$  is decreased in cells expressing  $\alpha$ -synuclein relative to cells not expressing  $\alpha$ -synuclein. Symbol \* details a significant difference ( $P < 0.05$ ) in uptake rate between cells expressing  $\alpha$ -synuclein relative to cells not expressing  $\alpha$ -synuclein at the respective concentration

Supplemental Figure 1

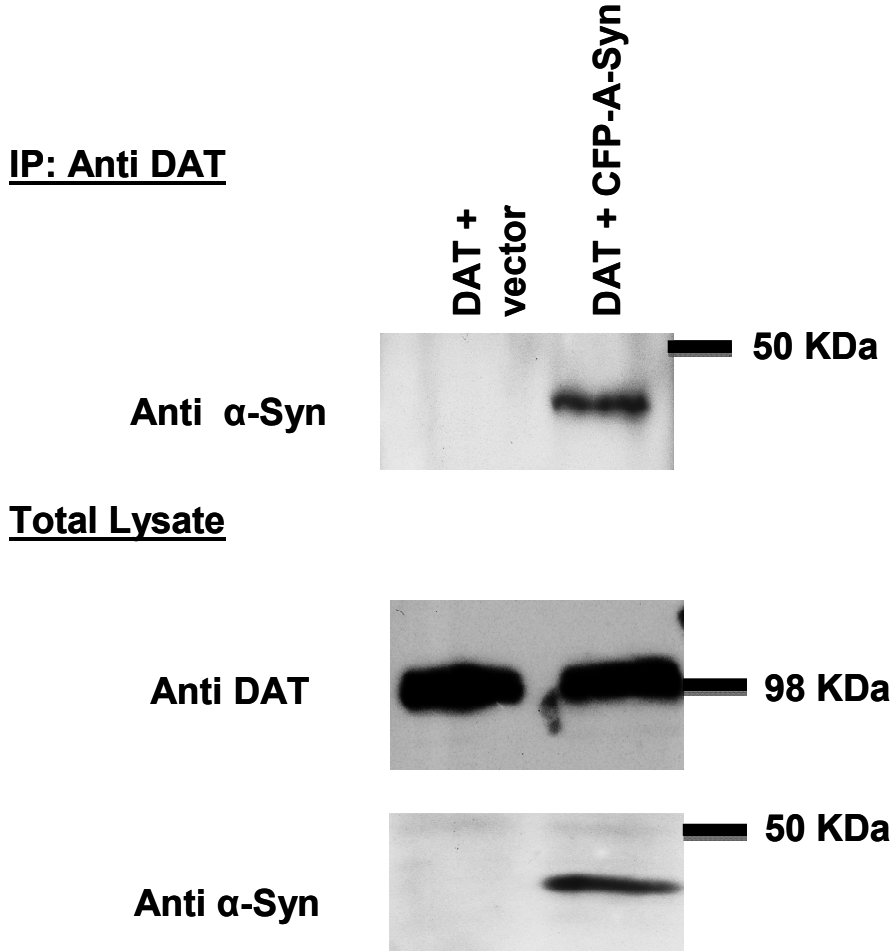

Supplemental Figure 2

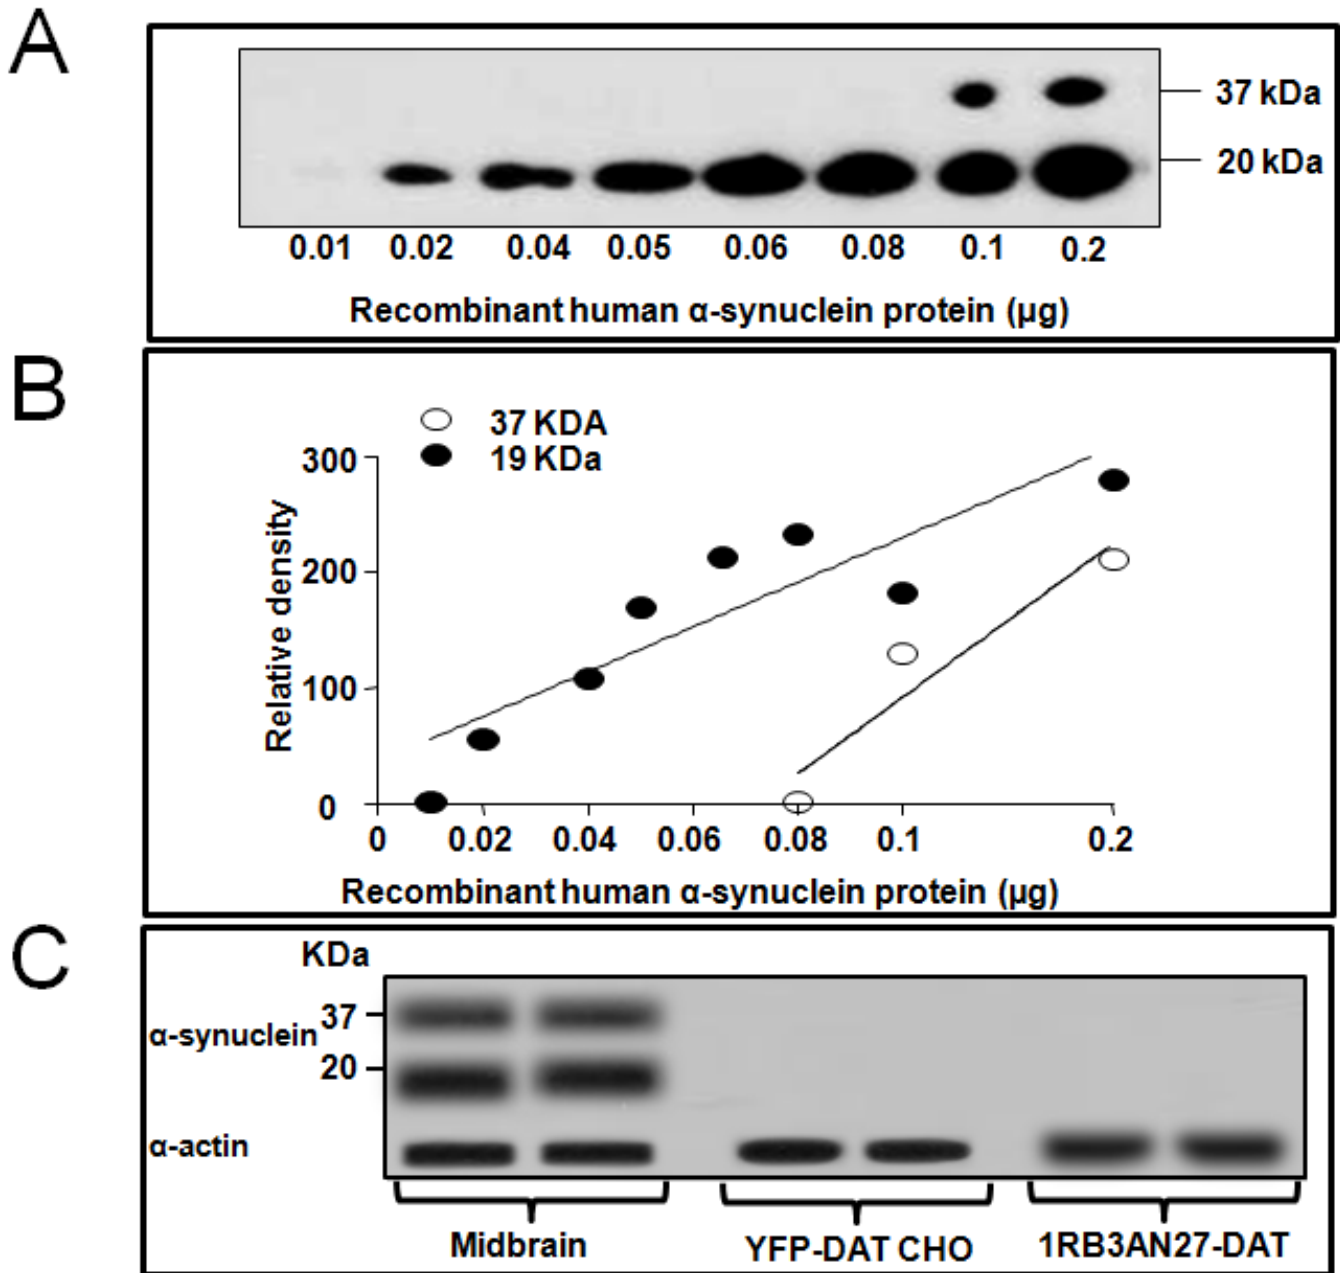

Supplement Figure 2D

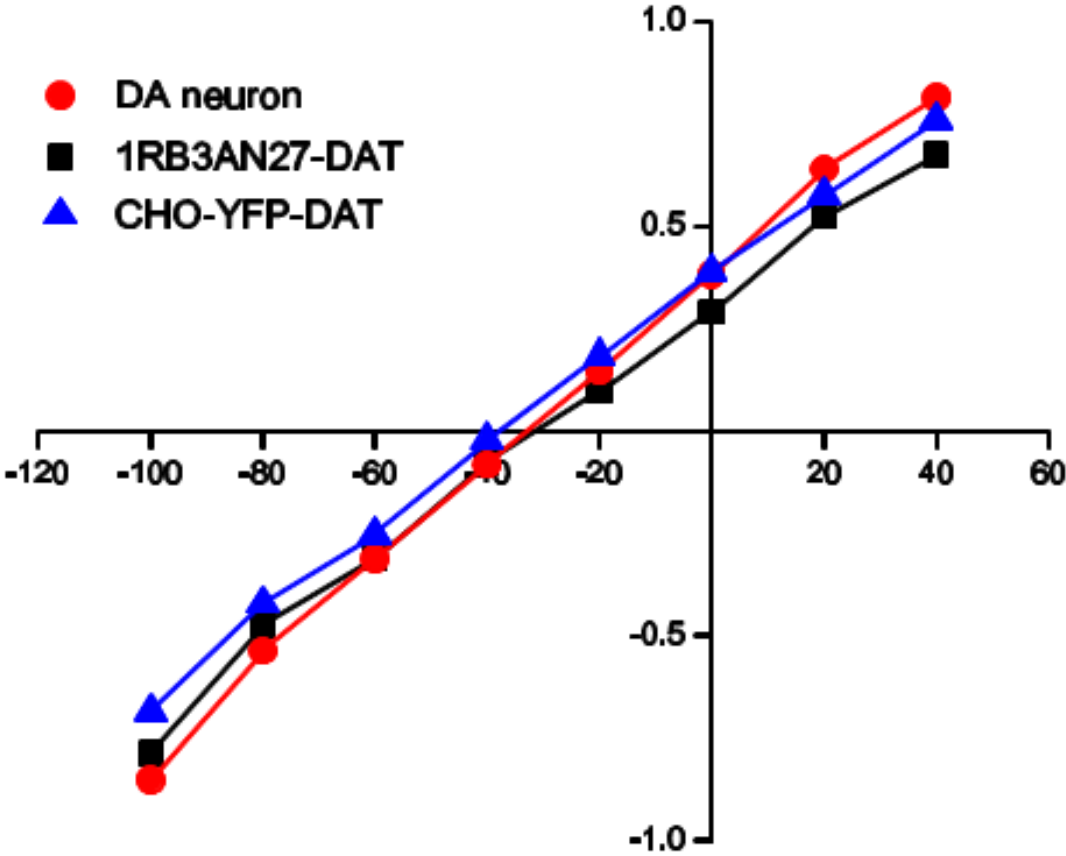

Supplemental Figure 3

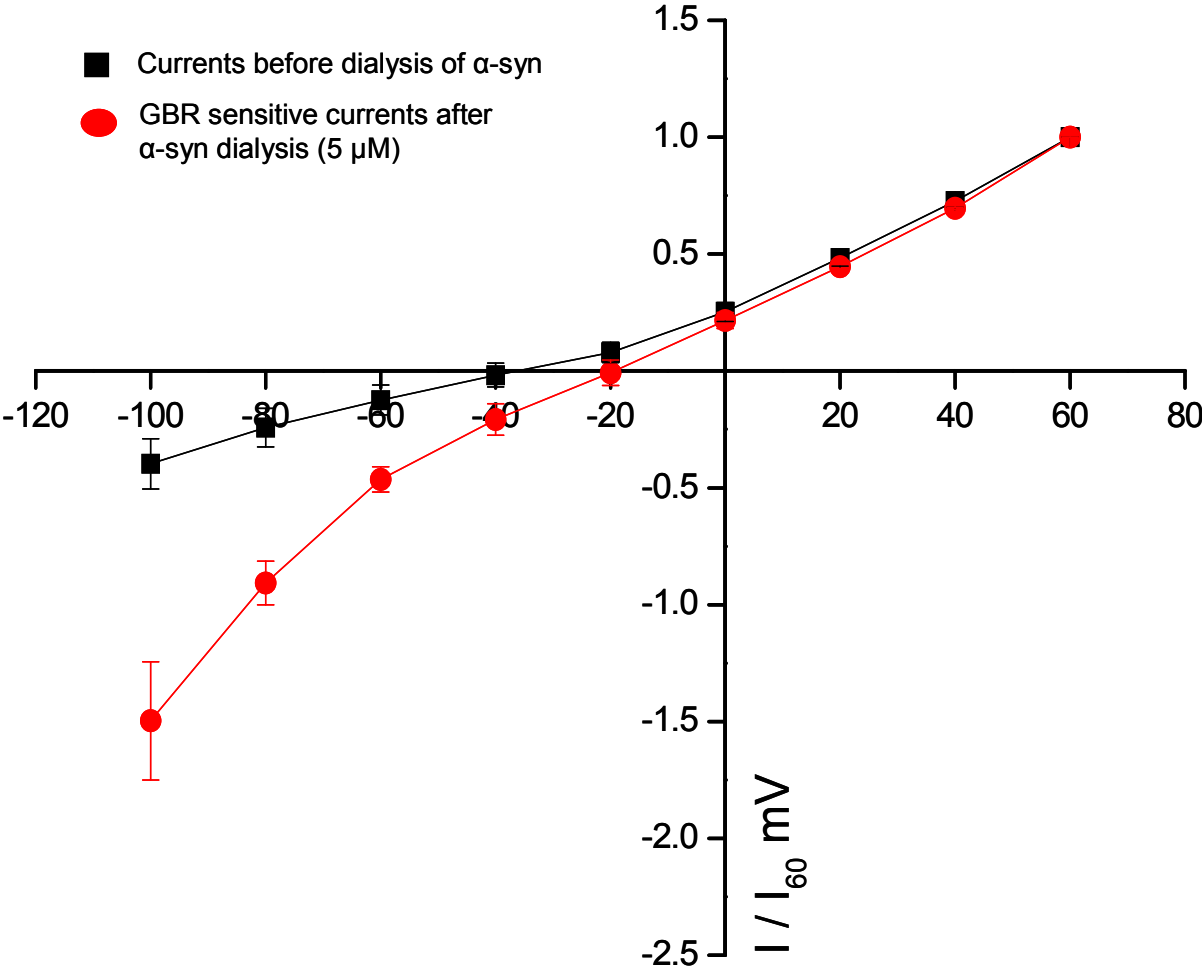

Supplemental table 1: Rate of ASP<sup>+</sup> uptake is decreased in cells expressing DAT and  $\alpha$ -synuclein at multiple concentrations.

| <b>[ASP+]<br/>(<math>\mu</math>M)</b> | <b>uptake rate no syn<br/>x 10<sup>3</sup> <math>\pm</math> SEM (n)</b> | <b>uptake rate with syn<br/>x 10<sup>3</sup> <math>\pm</math> SEM (n)</b> | <b>F(17,4788) =</b> |
|---------------------------------------|-------------------------------------------------------------------------|---------------------------------------------------------------------------|---------------------|
| <b>10</b>                             | <b>11.80 <math>\pm</math> .038 (24)</b>                                 | <b>6.64 <math>\pm</math> .013 (10)</b>                                    | <b>5.247*</b>       |
| <b>8</b>                              | <b>7.30 <math>\pm</math> .033 (28)</b>                                  | <b>3.95 <math>\pm</math> .029 (11)</b>                                    | <b>44.5*</b>        |
| <b>6</b>                              | <b>5.00 <math>\pm</math> .019 (76)</b>                                  | <b>4.32 <math>\pm</math> .032 (18)</b>                                    | <b>19.95*</b>       |
| <b>2</b>                              | <b>2.17 <math>\pm</math> .019 (78)</b>                                  | <b>1.74 <math>\pm</math> .031 (23)</b>                                    | <b>9.356*</b>       |
| <b>0.2</b>                            | <b>0.60 <math>\pm</math> .011 (22)</b>                                  | <b>0.02 <math>\pm</math> .007(13)</b>                                     | <b>8.03*</b>        |
| <b>0.02</b>                           | <b>0.30<math>\pm</math> .006 (26)</b>                                   | <b>-0.17 <math>\pm</math> .007 (12)</b>                                   | <b>0.4878</b>       |

Supplemental table 2: Uptake rate of ASP<sup>+</sup> in the presence of increasing DA.

| <b>log [DA]</b> | <b>uptake rate no syn<br/>x 10<sup>3</sup> <math>\pm</math> SEM (n)</b> | <b>uptake rate with syn<br/>x 10<sup>3</sup> <math>\pm</math> SEM (n)</b> | <b>F(11,3192) =</b> |
|-----------------|-------------------------------------------------------------------------|---------------------------------------------------------------------------|---------------------|
| <b>-4</b>       | <b>1.1 <math>\pm</math> .019 (48)</b>                                   | <b>0.95 <math>\pm</math> .043 (7)</b>                                     | <b>49.76*</b>       |
| <b>-5</b>       | <b>0.69 <math>\pm</math> .022 (132)</b>                                 | <b>0.08 <math>\pm</math> .067 (8)</b>                                     | <b>67.92*</b>       |
| <b>-6</b>       | <b>2.79 <math>\pm</math> .019 (63)</b>                                  | <b>2.35 <math>\pm</math> .022 (9)</b>                                     | <b>22.39*</b>       |
| <b>-7</b>       | <b>3.69 <math>\pm</math> .028 (98)</b>                                  | <b>2.19 <math>\pm</math> .017 (11)</b>                                    | <b>39.11*</b>       |
| <b>-8</b>       | <b>3.94 <math>\pm</math> .033 (69)</b>                                  | <b>2.14 <math>\pm</math> .021 (20)</b>                                    | <b>44.16*</b>       |
| <b>-9</b>       | <b>4.57 <math>\pm</math> .063 (26)</b>                                  | <b>1.59 <math>\pm</math> .050 (18)</b>                                    | <b>46.58*</b>       |
